# Supplementary material for: Rapid Mercury(II) Removal by Electrospun Sulfur Copolymers
Source: PubMed Central journal article supplement (PMC6432393; doi:10.3390/polym8070266), 2016-07-20
Supplement: polymers-08-00266-s001.pdf [file polymers-08-00266-s001.pdf]

## Supplementary Materials: Rapid Mercury(II) Removal by Electrospun Sulfur Copolymers

Michael W. Thielke, Lindsey A. Bultema, Daniel D. Brauer, Bernadette Richter, Markus Fischer and Patrick Theato

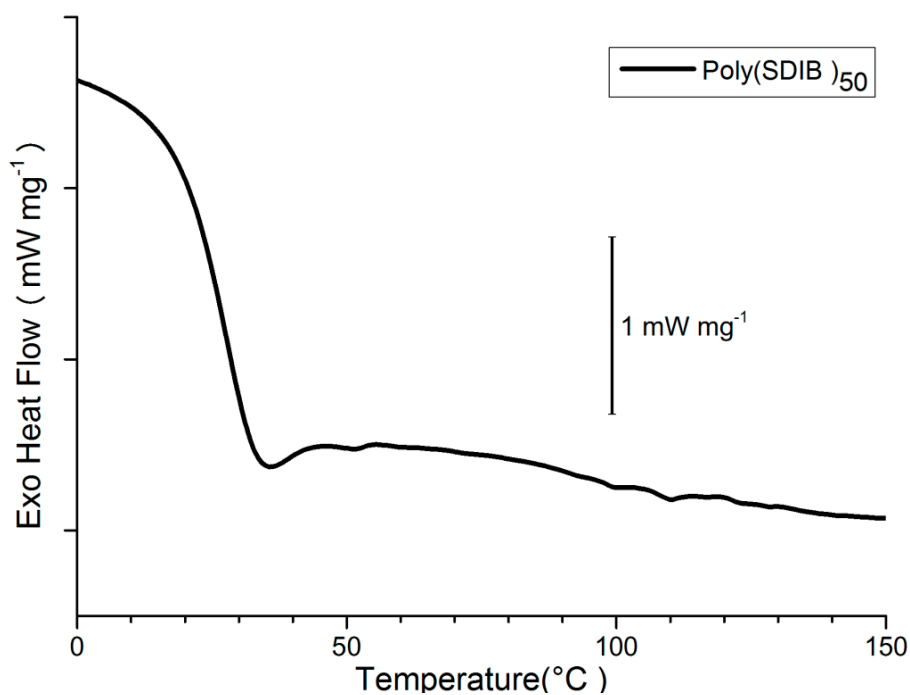

**Figure S1.** Dynamic scanning calorimetry measurement of the Poly(SDIB). The utilized sulfur was fully converted to Poly(SDIB) and showed no melting of S<sub>8</sub> at 115 °C.

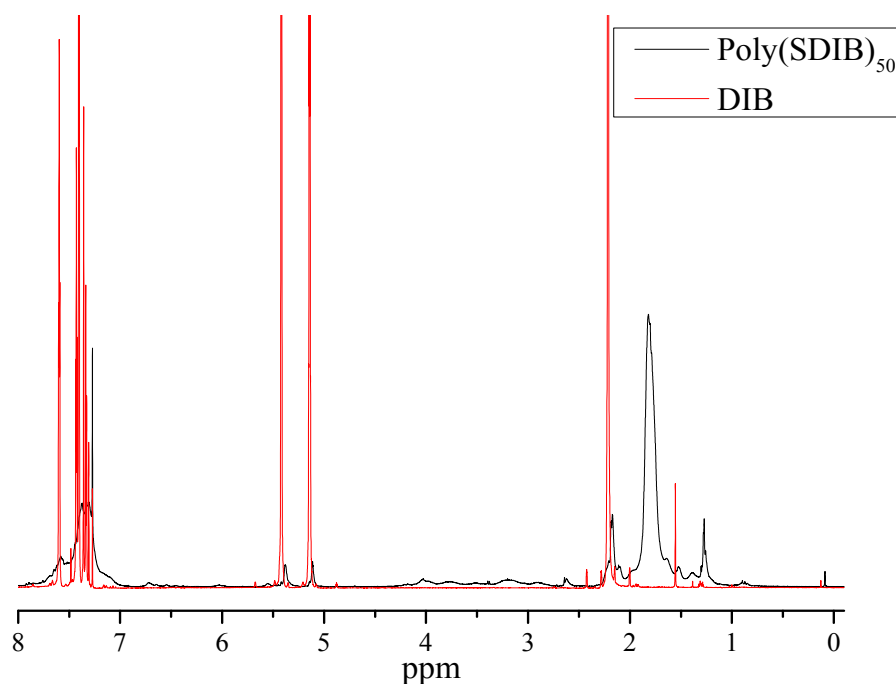

**Figure S2.** <sup>1</sup>H-NMR of Poly(SDIB)<sub>50</sub> (black) and DIB (red). Compared to the DIB, the Poly(SDIB) shows a decrease of the signal at 2.2 ppm, while a new signal at 1.8 ppm arises. This is caused by reaction of the inverse vulcanization.

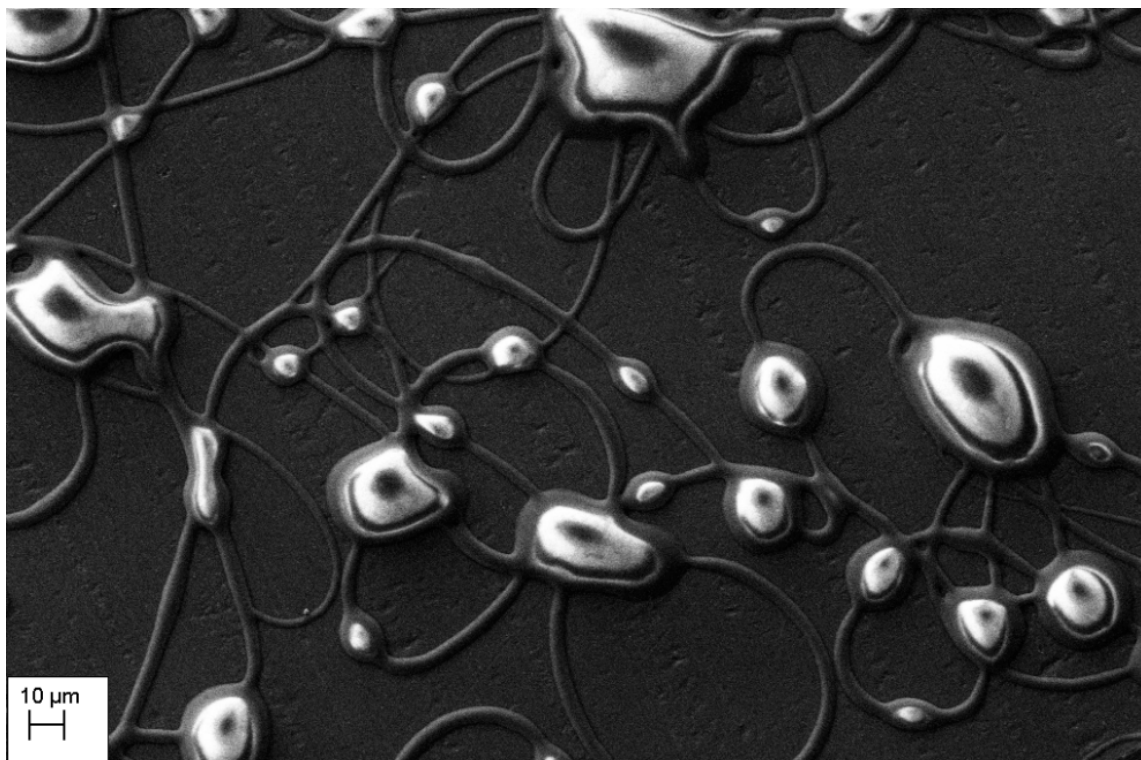

**Figure S3.** Scanning electron microscopy images of pure poly(SDIB) fibers from electrospinning. The resulting fibers melted to the collector surface and with each other on contact points.

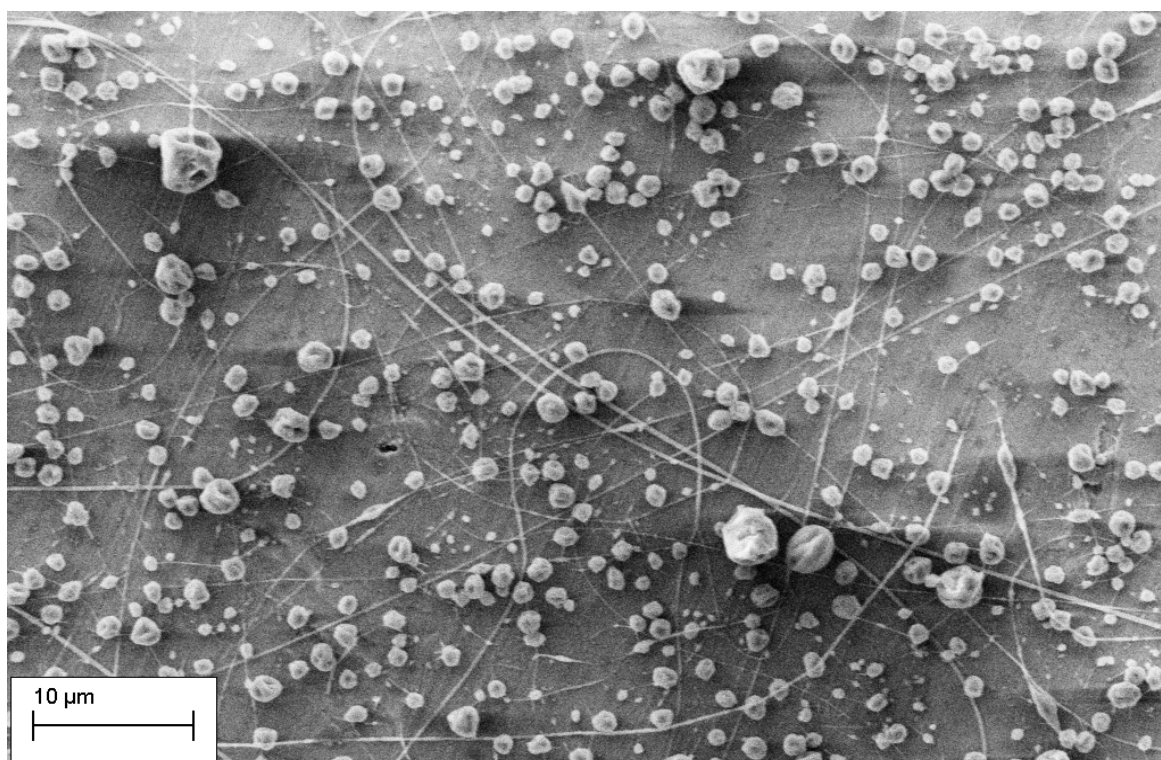

**Figure S4.** Scanning electron microscopy images of 15 wt % poly(SDIB) in a 3 wt % PMMA solution in THF/DMF (7:3; *w:w*).

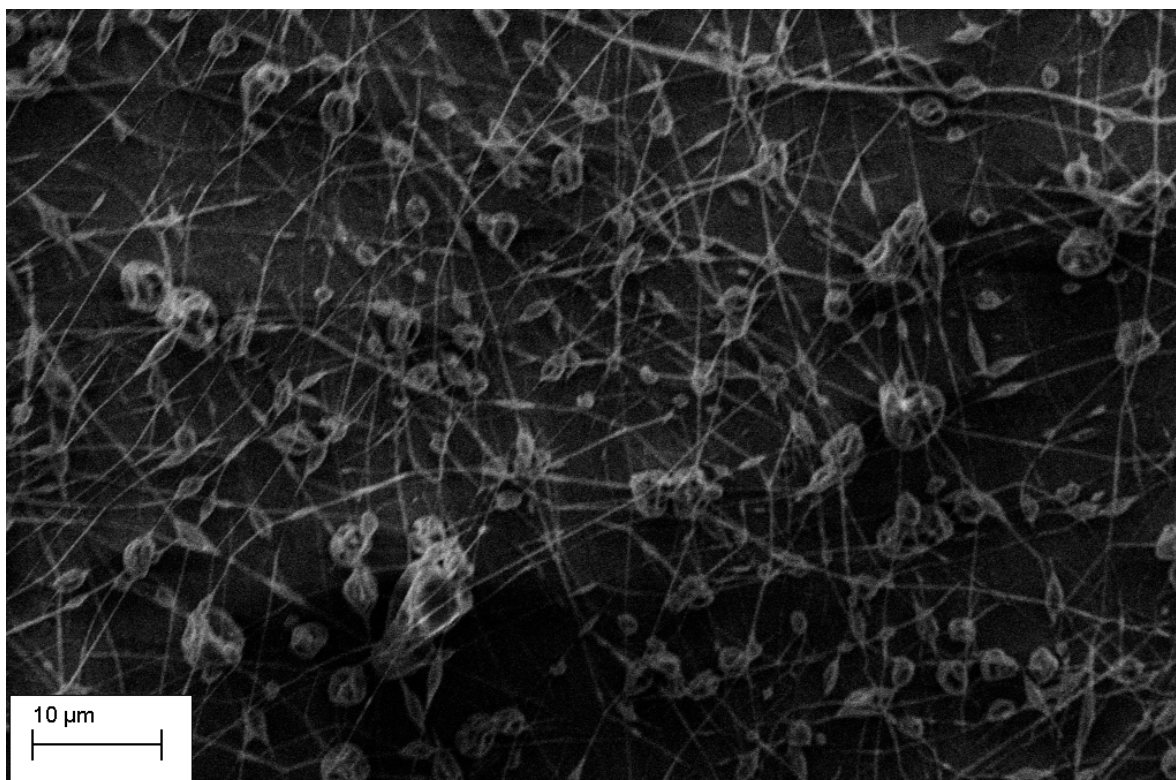

**Figure S5.** Scanning electron microscopy images of 15 wt % poly(SDIB) in a 4 wt % PMMA solution in THF/DMF (7:3; *w:w*).

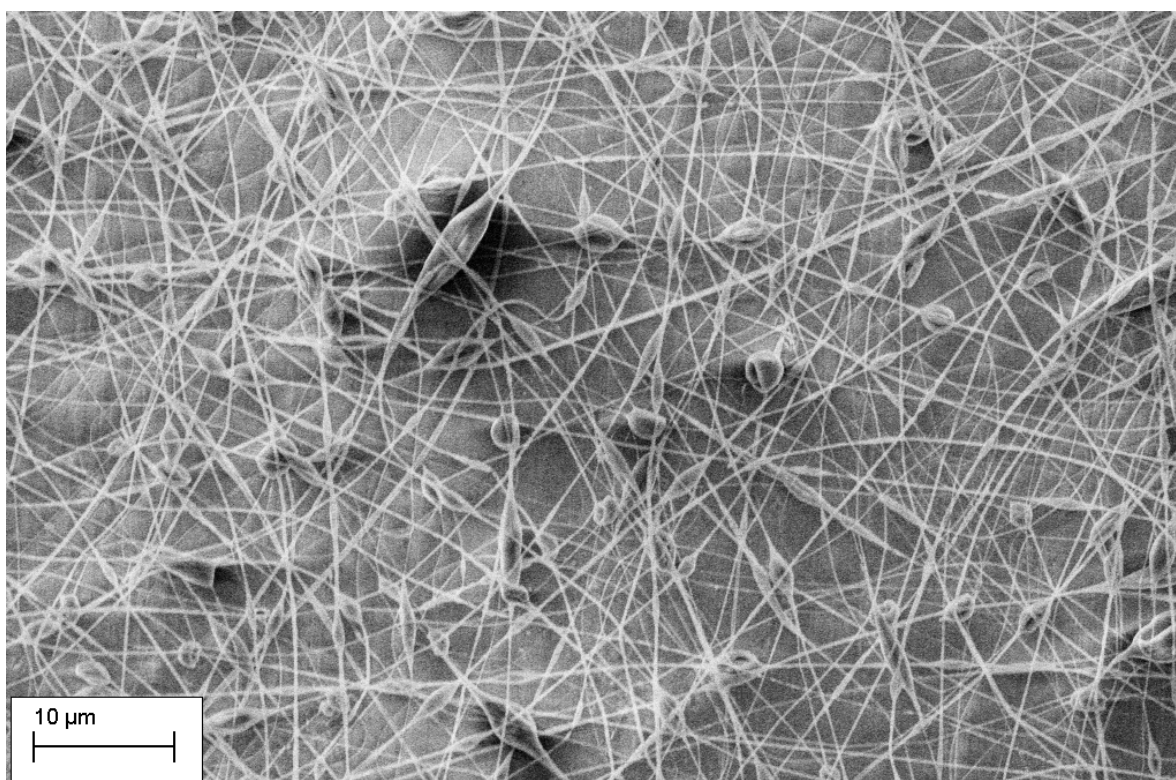

**Figure S6.** Scanning electron microscopy images of 15 wt % poly(SDIB) in a 5 wt % PMMA solution in THF/DMF (7:3; *w:w*).

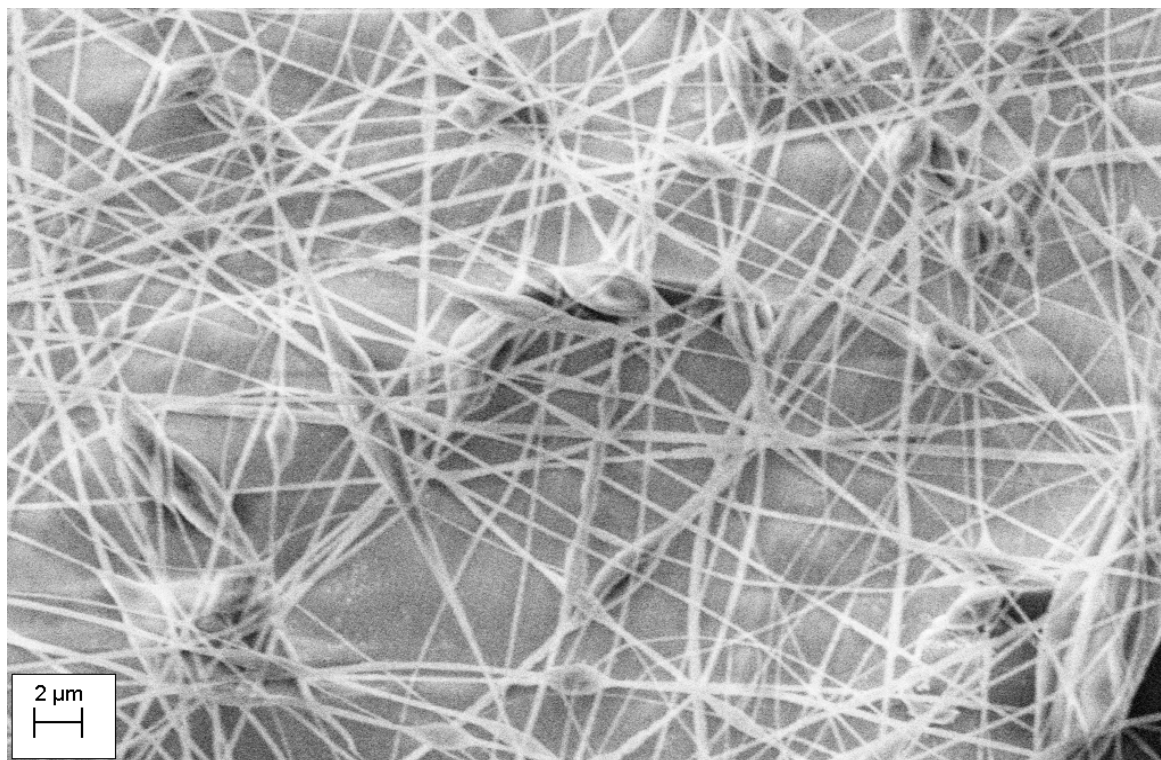

**Figure S7.** Scanning electron microscopy images of 15 wt % poly(SDIB) in a 6 wt % PMMA solution in THF/DMF (7:3; *w:w*).

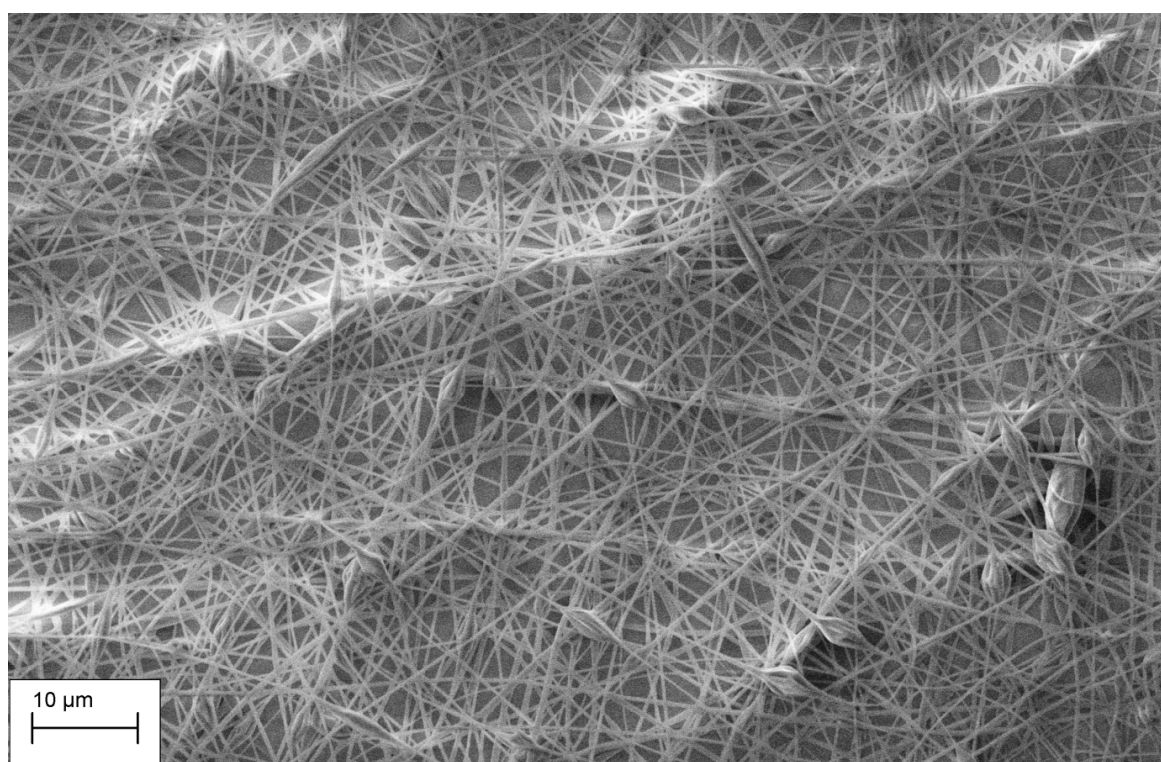

**Figure S8.** Scanning electron microscopy images of 15 wt % poly(SDIB) in a 7 wt % PMMA solution in THF/DMF (7:3; *w:w*).

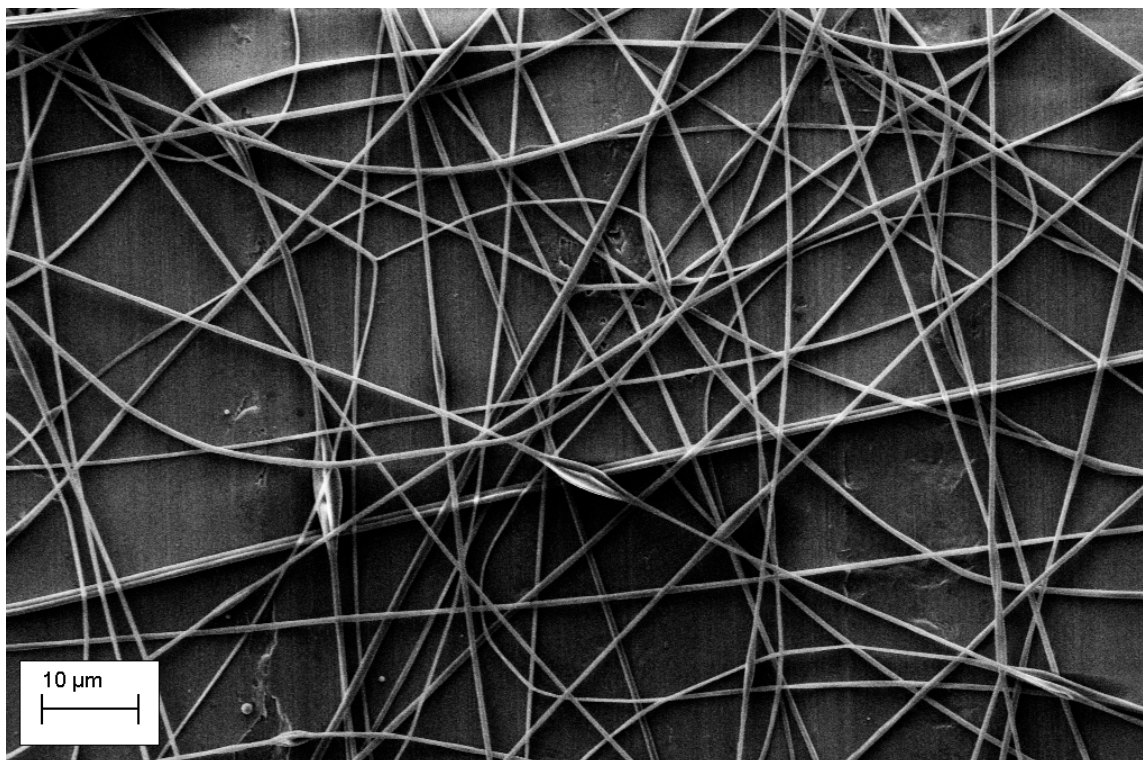

**Figure S9.** Scanning electron microscopy images of 15 wt % poly(SDIB) in a 8 wt % PMMA solution in THF/DMF (7:3; *w:w*).

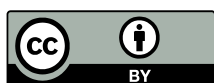

© 2016 by the authors; licensee MDPI, Basel, Switzerland. This article is an open access article distributed under the terms and conditions of the Creative Commons Attribution (CC-BY) license (<http://creativecommons.org/licenses/by/4.0/>).
